# Supplementary material for: Dietary Wheat Amylase Trypsin Inhibitors Impact Alzheimer’s Disease Pathology in 5xFAD Model Mice
Source: PubMed Central journal article supplement (PMC7503408; doi:10.3390/ijms21176288), 2020-08-31
Supplement: ijms-21-06288-s001.pdf [file ijms-21-06288-s001.pdf]

**Suppl.** Table 1. Dietary composition of customized gluten- and ATI-free diet (percentage of ingredients and amino acids).

| Gluten- and ATI-free diet (S8251-E030) |                |                      |                |
|----------------------------------------|----------------|----------------------|----------------|
| Ingredients                            | Percentage (%) | Amino acids          | Percentage (%) |
| Wheat Gluten (Sigma (>80%CP))          | -              | Lysine               | 1.7            |
| Casein                                 | 20.3           | Methionine           | 1.0            |
| Cornstarch. pre-gelatinized            | -              | Met & Cys            | 1.1            |
| Maltodextrin                           | -              | Threonine            | 1.0            |
| Corn. pre- treated                     | 21             | Tryptophan           | 0.3            |
| Rice meal                              | 41             | Arginine             | 1.0            |
| Sucrose                                | 2              | Histidine            | 0.7            |
| Lignocellulose                         | 2              | Valine               | 1.5            |
| pur. Cellulose powder                  | 3              | Isoleucine           | 1.2            |
| L-cystine                              | -              | Leucine              | 2.3            |
| L-Lysine HCl                           | -              | Phenylalanine        | 1.2            |
| DL-Methionine                          | 0.2            | Phe & Tyr            | 2.2            |
| Mineral & Trace element premix         | 6              | Glycine              | 0.6            |
| Vitamin premix                         | 1              | Glutamic acid (+Gln) | 4.9            |
| Choline chloride                       | 0.3            | Aspartic acid (+Asn) | 1.8            |
| Soybean oil                            | 3.3            | Proline              | 2.3            |
|                                        |                | Serine               | 1.3            |
|                                        |                | Alanine              | 0.9            |

**Suppl.** Table 2. Statistical comparison of oxygen consumption over the 24h measurement period. P-values <0.05 derived by multiple t-test are indicated by a \*.

| gluten-free without ATI versus low ATI |         | gluten-containing low versus high ATI |         | gluten-free without ATI versus low ATI |         | gluten-containing low versus high ATI |         |
|----------------------------------------|---------|---------------------------------------|---------|----------------------------------------|---------|---------------------------------------|---------|
| time of day                            | p-value | time of day                           | p-value | time of day                            | p-value | time of day                           | p-value |
| 18:00                                  | * 0,040 | 18:00                                 | * 0,006 | 06:00                                  | 0,528   | 06:00                                 | 0,197   |
|                                        | 0,289   |                                       | 0,226   |                                        | 0,552   |                                       | * 0,009 |
|                                        | * 0,044 |                                       | * 0,016 |                                        | * 0,034 |                                       | * 0,004 |
|                                        | 0,218   |                                       | 0,095   |                                        | 0,191   |                                       | * 0,005 |
| 19:00                                  | 0,914   | 19:00                                 | * 0,013 | 07:00                                  | 0,094   | 07:00                                 | * 0,007 |
|                                        | 0,114   |                                       | * 0,021 |                                        | 0,431   |                                       | 0,086   |
|                                        | * 0,036 |                                       | * 0,008 |                                        | 0,609   |                                       | 0,144   |
|                                        | * 0,026 |                                       | * 0,004 |                                        | 0,735   |                                       | * 0,012 |
| 20:00                                  | 0,071   | 20:00                                 | * 0,009 | 08:00                                  | 0,752   | 08:00                                 | * 0,005 |
|                                        | 0,080   |                                       | * 0,006 |                                        | 0,408   |                                       | 0,101   |
|                                        | 0,130   |                                       | * 0,004 |                                        | 0,873   |                                       | * 0,015 |
|                                        | 0,326   |                                       | * 0,045 |                                        | 0,380   |                                       | * 0,015 |

|       |   |       |       |   |       |       |       |       |   |       |
|-------|---|-------|-------|---|-------|-------|-------|-------|---|-------|
| 21:00 | * | 0,024 | 21:00 | * | 0,008 | 09:00 | 0,176 | 09:00 | * | 0,018 |
|       |   | 0,065 |       | * | 0,002 |       | 0,131 |       | * | 0,015 |
|       | * | 0,028 |       | * | 0,011 |       | 0,328 |       | * | 0,044 |
|       |   | 0,109 |       | * | 0,036 |       | 0,533 |       |   | 0,743 |
| 22:00 |   | 0,051 | 22:00 | * | 0,042 | 10:00 | 0,961 | 10:00 |   | 0,440 |
|       | * | 0,016 |       | * | 0,006 |       | 0,256 |       |   | 0,101 |
|       |   | 0,055 |       | * | 0,014 |       | 0,294 |       |   | 0,094 |
|       | * | 0,008 |       | * | 0,001 |       | 0,430 |       |   | 0,052 |
| 23:00 |   | 0,055 | 23:00 | * | 0,002 | 11:00 | 0,633 | 11:00 |   | 0,058 |
|       |   | 0,089 |       | * | 0,001 |       | 0,756 |       | * | 0,020 |
|       |   | 0,333 |       | * | 0,017 |       | 0,427 |       | * | 0,032 |
|       |   | 0,186 |       | * | 0,030 |       | 0,426 |       |   | 0,087 |
| 00:00 |   | 0,057 | 00:00 | * | 0,003 | 12:00 | 0,648 | 12:00 | * | 0,039 |
|       |   | 0,082 |       | * | 0,001 |       | 0,439 |       |   | 0,182 |
|       |   | 0,213 |       | * | 0,003 |       | 0,227 |       | * | 0,006 |
|       |   | 0,167 |       | * | 0,004 |       | 0,362 |       | * | 0,031 |
| 01:00 |   | 0,467 | 01:00 | * | 0,010 | 13:00 | 0,517 | 13:00 | * | 0,005 |
|       |   | 0,340 |       |   | 0,202 |       | 0,675 |       | * | 0,007 |
|       |   | 0,154 |       |   | 0,123 |       | 0,730 |       | * | 0,031 |
|       |   | 0,360 |       | * | 0,014 |       | 0,172 |       |   | 0,074 |
| 02:00 |   | 0,970 | 02:00 | * | 0,017 | 14:00 | 0,529 | 14:00 |   | 0,077 |
|       |   | 0,439 |       | * | 0,001 |       | 0,907 |       |   | 0,213 |
|       |   | 0,677 |       | * | 0,006 |       | 0,711 |       |   | 0,575 |
|       |   | 0,174 |       | * | 0,000 |       | 0,374 |       |   | 0,289 |
| 03:00 | * | 0,029 | 03:00 | * | 0,000 | 15:00 | 0,628 | 15:00 |   | 0,119 |
|       |   | 0,084 |       | * | 0,008 |       | 0,242 |       | * | 0,016 |
|       |   | 0,439 |       |   | 0,051 |       | 0,208 |       |   | 0,052 |
|       |   | 0,761 |       |   | 0,188 |       | 0,215 |       |   | 0,372 |
| 04:00 |   | 0,798 | 04:00 |   | 0,101 | 16:00 | 0,277 | 16:00 |   | 0,165 |
|       |   | 0,997 |       | * | 0,024 |       | 0,502 |       |   | 0,154 |
|       |   | 0,768 |       | * | 0,040 |       | 0,739 |       | * | 0,041 |
|       |   | 0,806 |       | * | 0,016 |       | 0,464 |       | * | 0,031 |
| 05:00 |   | 0,489 | 05:00 | * | 0,001 | 17:00 | 0,105 | 17:00 | * | 0,002 |
|       |   | 0,819 |       | * | 0,024 | *     | 0,015 |       | * | 0,000 |
|       |   | 0,816 |       | * | 0,039 |       | 0,598 |       |   | 0,060 |
| .     |   | 0,490 |       |   | 0,095 |       | 0,987 |       |   | 0,195 |

Suppl. Table 3. SYBR Green primer sequences (Eurofins, Hamburg, Germany).

| Genes       | Primers<br>(F, Forward and R, Reverse)                                   |
|-------------|--------------------------------------------------------------------------|
| IL1 $\beta$ | F caa cca aca agt gat att ctc cat g<br>R gat cca cac tct cca gct gca     |
| CCL2        | F ccc aat gag tag gct gga ga<br>R tct gga ccc att cct tct tg             |
| beta actin  | F ggc att gtt acc aac tgg gac gac<br>R cca gag gca tac agg gac agc aca g |

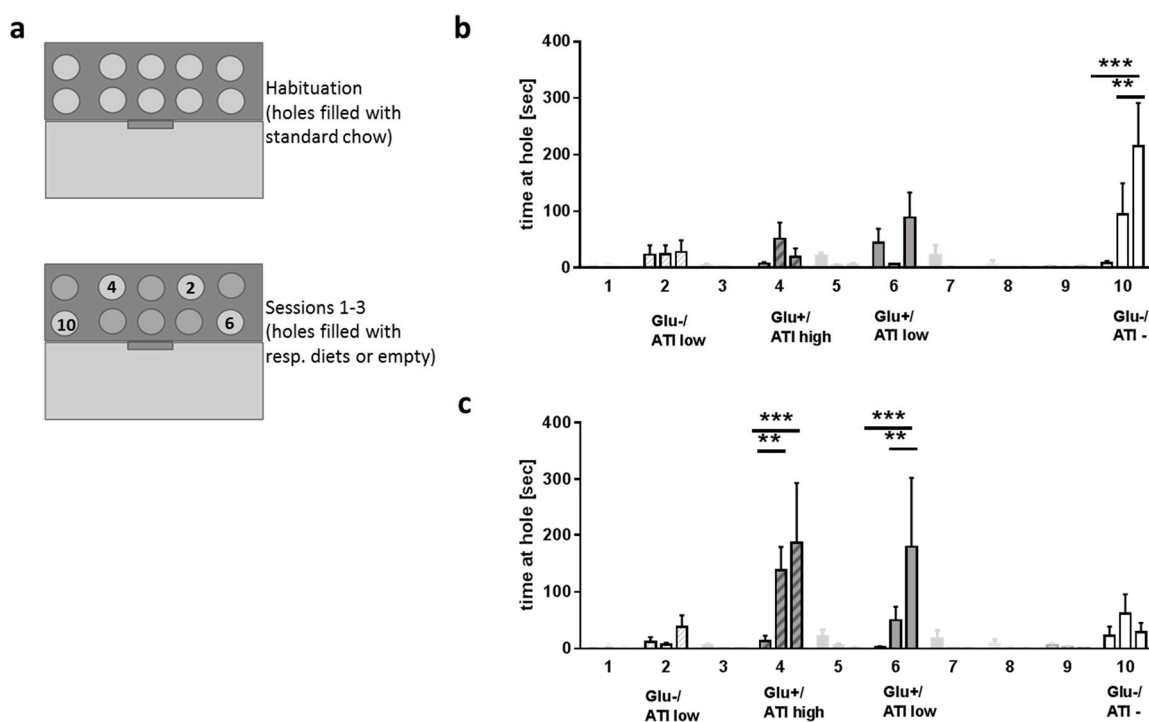

**Suppl. Figure 1. Food preference in male and female 5xFAD mice.** (a) Mice were habituated to a two-chamber containing an entry box (light grey) and a hole-board (dark grey) with each hole filled with standard diet on day one. Mice were introduced in the entry chamber and the door was opened after 1 min to allow access to the hole-board for 10 min. The following three days, mice (b: male; c: female; n=4 each) were presented the four different diets in the indicated holes (2,4,6,10) and time spent at each hole within the 10 min was recorded with an automated camera system (EthoVision 8.5, Noldus software, The Netherlands)). The position of each diet was kept during the whole test to allow memorizing palatable food. Data were analyzed by Two Way ANOVA with Tukey's multiple comparisons test (\*\*,  $p < 0.01$ ; \*\*\*,  $p < 0.001$ ) and are presented as mean of time + SEM for each hole at each of the testing days.
